# Supplementary material for: A single nucleotide polymorphism assay sheds light on the extent and distribution of genetic diversity, population structure and functional basis of key traits in cultivated north American cannabis
Source: PubMed Central journal article supplement (PMC7819309; doi:10.1186/s42238-020-00036-y), 2020-09-11
Supplement: 42238_2020_36_MOESM1_ESM.pdf [file 42238_2020_36_MOESM1_ESM.pdf]

Supplementary Material Figure S1:

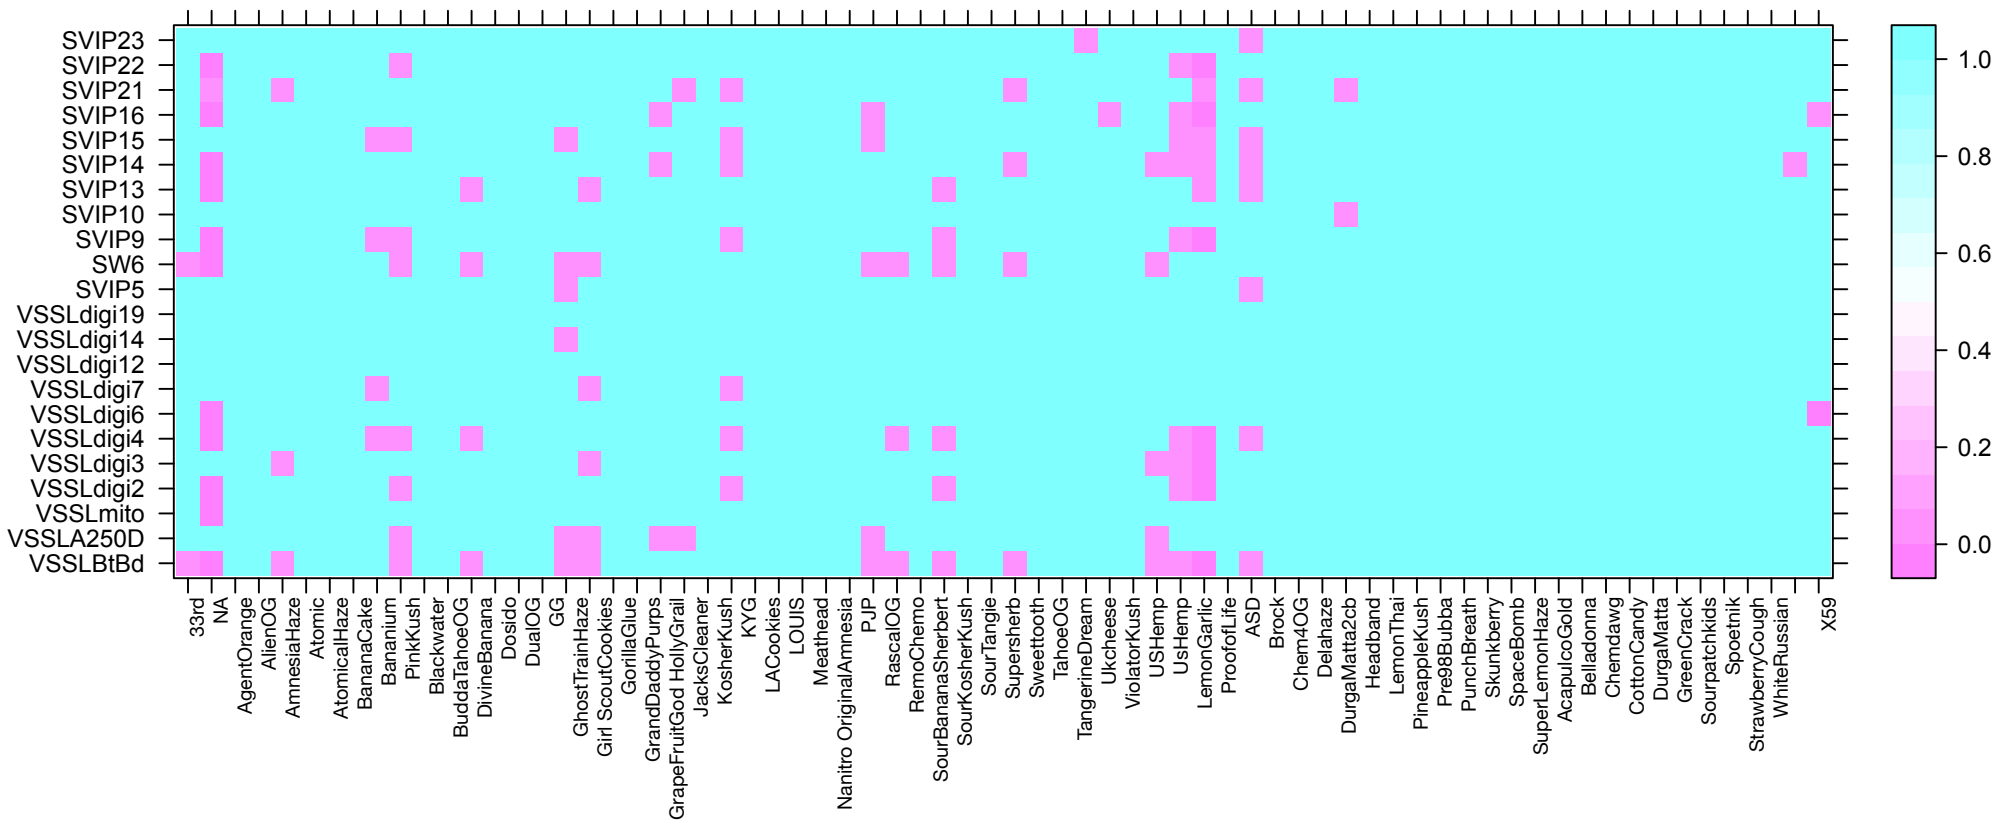

Supplementary material Figure S2:

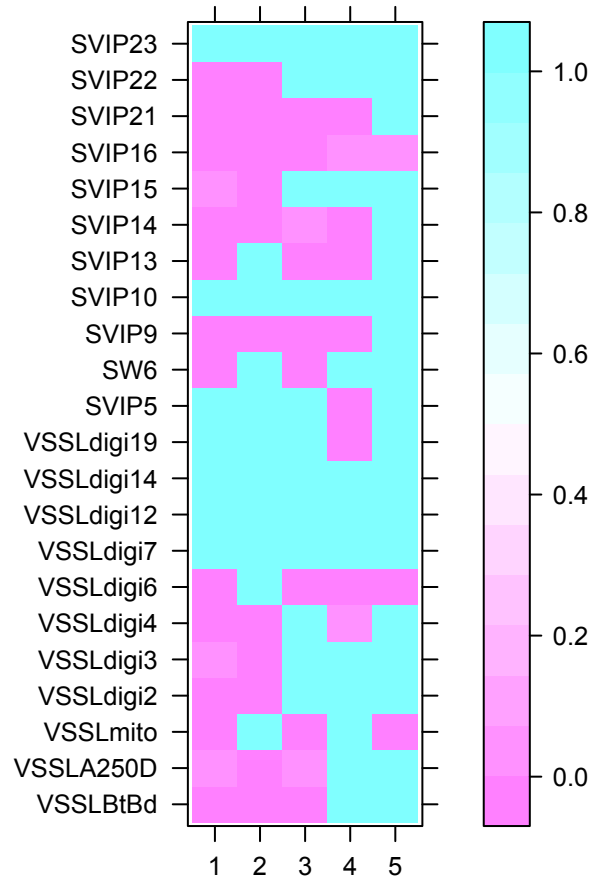

Supplementary Material Table S1

| Pop              | N | MLG | Hexp | la                 |             |
|------------------|---|-----|------|--------------------|-------------|
| 33rd             |   | 5   | 5    | <b>0.190909091</b> | 1.580487805 |
| AmnesiaHaze      |   | 4   | 4    | 0.381493506        | 0.725925926 |
| ASD              |   | 4   | 3    | <b>0.188311688</b> | 2.217391304 |
| AtomicalHaze     |   | 3   | 3    | 0.275757576        | 1.818181818 |
| BananaCake       |   | 3   | 3    | 0.284848485        | 0.625       |
| Banium           |   | 5   | 5    | 0.246464646        | 0.475       |
| Blackwater       |   | 3   | 3    | 0.281818182        | 2           |
| BuddaTahoeOG     |   | 3   | 3    | 0.327272727        | -0.2        |
| Chem4OG          |   | 3   | 3    | <b>0.163636364</b> | 2.5         |
| CottonCandy      |   | 3   | 3    | <b>0.133333333</b> | <b>0.75</b> |
| Delahaze         |   | 5   | 4    | 0.27979798         | 3.058020478 |
| DivineBanana     |   | 4   | 4    | 0.282467532        | 1.402298851 |
| Dosido           |   | 3   | 3    | 0.321212121        | 1.6         |
| DualOG           |   | 6   | 6    | 0.289944904        | 0.8125      |
| DurgaMatta       |   | 3   | 2    | <b>0.2</b>         | 8           |
| DurgaMatta2cb    |   | 3   | 1    | <b>0.190909091</b> | <b>0</b>    |
| GhostTrainHaze   |   | 4   | 4    | 0.355519481        | 1.663366337 |
| Girl coutCookies |   | 7   | 7    | 0.308191808        | 1.30044843  |

| Pop             | N | MLG | Hexp               | la           |
|-----------------|---|-----|--------------------|--------------|
| GorillaGlue     | 3 | 3   | 0.266666667        | 3.454545455  |
| GrapeFruitGod   | 4 | 4   | 0.258116883        | 1.454545455  |
| HollyGrail      | 4 | 4   | 0.285714286        | -0.295652174 |
| JacksCleaner    | 3 | 3   | 0.275757576        | 0.625        |
| KosherKush      | 4 | 4   | 0.331168831        | 0.225806452  |
| KYG             | 3 | 3   | 0.363636364        | -0.8         |
| LACookies       | 5 | 5   | 0.294949495        | -0.032171582 |
| LOUIS           | 3 | 3   | 0.272727273        | 8.25         |
| Meathead        | 2 | 2   | 0.310606061        | NA           |
| Nanitro         | 3 | 3   | 0.260606061        | 6.3          |
| OriginalAmnesia | 5 | 4   | 0.214141414        | 1.197452229  |
| PineappleKush   | 3 | 3   | 0.3                | 0.5          |
| PinkKush        | 7 | 3   | <b>0.18981019</b>  | 1.5          |
| PJP             | 4 | 4   | 0.225649351        | 0.03030303   |
| ProofofLife     | 4 | 2   | 0.266233766        | 3            |
| PunchBreath     | 3 | 2   | <b>0.136363636</b> | 2            |
| RemoChemo       | 4 | 4   | 0.251623377        | -0.677419355 |
| SourTangie      | 7 | 7   | 0.283716284        | 0.725943971  |
| SpaceBomb       | 3 | 3   | 0.233333333        | 1.8          |

| Pop             | N   | MLG | Hexp               | la                 |
|-----------------|-----|-----|--------------------|--------------------|
| StrawberryCough | 3   | 3   | <b>0.124242424</b> | <b>0.75</b>        |
| Sweettooth      | 3   | 3   | 0.351515152        | 1.153846154        |
| TahoeOG         | 5   | 5   | 0.211111111        | 1.482758621        |
| TangerineDream  | 9   | 9   | 0.322638146        | 0.840565086        |
| UsHemp          | 20  | 11  | 0.279545455        | 0.994321219        |
| USHemp          | 7   | 6   | 0.293706294        | 1.635103926        |
| ViolatorKush    | 7   | 7   | 0.303696304        | 1.38769671         |
| WhiteRussian    | 7   | 7   | <b>0.184315684</b> | <b>0.327198364</b> |
| X59             | 14  | 14  | <b>0.093073593</b> | <b>0.167832168</b> |
| Total / average | 420 | 361 | 0.330011764        | 0.570375586        |

Supplementary Material Table S2

| SNP        | allele | 1-D | Hexp         | Evenness    |             |
|------------|--------|-----|--------------|-------------|-------------|
| VSSLBtBd   |        | 2   | 0.4861111111 | 0.486690505 | 0.97290917  |
| VSSLA250D  |        | 2   | 0.318568594  | 0.318948294 | 0.722946759 |
| VSSLmito   |        | 2   | 0.073287982  | 0.073375333 | 0.450170654 |
| VSSLdigi2  |        | 2   | 0.404036281  | 0.40451785  | 0.836002253 |
| VSSLdigi3  |        | 2   | 0.497276077  | 0.497868778 | 0.994579203 |
| VSSLdigi4  |        | 2   | 0.427437642  | 0.427947103 | 0.871561439 |
| VSSLdigi6  |        | 2   | 0.075484694  | 0.075574664 | 0.453144701 |
| VSSLdigi7  |        | 2   | 0.25997449   | 0.260284352 | 0.656034447 |
| VSSLdigi12 |        | 2   | 0.04875      | 0.048808105 | 0.413244143 |
| VSSLdigi14 |        | 2   | 0.136723356  | 0.136886316 | 0.52560179  |
| VSSLdigi19 |        | 2   | 0.025847506  | 0.025878313 | 0.367110514 |
| SVIP5      |        | 2   | 0.499770408  | 0.500366082 | 0.99954101  |
| SW6        |        | 2   | 0.49744898   | 0.498041887 | 0.994921692 |
| SVIP9      |        | 2   | 0.470510204  | 0.471071003 | 0.94401974  |
| SVIP10     |        | 2   | 0.128560091  | 0.128713321 | 0.5166806   |
| SVIP13     |        | 2   | 0.485306122  | 0.485884556 | 0.971379846 |
| SVIP14     |        | 2   | 0.355226757  | 0.35565015  | 0.768669616 |
| SVIP15     |        | 2   | 0.499657029  | 0.500252568 | 0.99931449  |

| SNP    | allele | 1-D | Hexp        | Evenness    |             |
|--------|--------|-----|-------------|-------------|-------------|
| SVIP16 |        | 2   | 0.447573696 | 0.448107157 | 0.90420323  |
| SVIP21 |        | 2   | 0.409180839 | 0.40966854  | 0.843617072 |
| SVIP22 |        | 2   | 0.317131519 | 0.317509507 | 0.721223835 |
| SVIP23 |        | 2   | 0.387752268 | 0.388214428 | 0.812593468 |
| mean   |        | 2   | 0.329618893 | 0.330011764 | 0.760884985 |

allele = Number of observed alleles

Hexp-Nei's gene diversity (expected heterozygosity)

Evenness - Index of Association for each population factor

Supplementary Material Table S3

| <b>K</b> | <b>Producer</b>    | <b>Origin</b> | <b>Pop</b>   | <b>Ind</b>   |
|----------|--------------------|---------------|--------------|--------------|
| <b>3</b> | Emerald Flower     | BC            | 33rd         | 33rd1        |
| <b>1</b> | Emerald Flower     | BC            | 33rd         | 33rd10       |
| <b>3</b> | Emerald Flower     | BC            | 33rd         | 33rd6        |
| <b>3</b> | Emerald Flower     | BC            | 33rd         | 33rd7        |
| <b>3</b> | Emerald Flower     | BC            | 33rd         | 33rd8        |
| <b>1</b> | Acres              | NV            | NA           | 5thDimension |
| <b>1</b> | Nature's Chemistry | NV            | NA           | 702OG        |
| <b>3</b> | GLP                | NV            | NA           | 9LBHammer    |
| <b>4</b> | VSSL               | BC            | AcapulcoGold | aca2         |
| <b>4</b> | VSSL               | BC            | AcapulcoGold | AcapulcoGold |
| <b>2</b> | Happy Campers      | NV            | NA           | Adam         |
| <b>1</b> | Flowr              | BC            | AgentOrange  | Agentorange1 |
| <b>1</b> | Nature's Chemistry | NV            | NA           | AirForceOne  |
| <b>3</b> | Emerald Flower     | BC            | NA           | AK59         |
| <b>2</b> | Yield Farming      | NV            | USHemp       | Alamo        |
| <b>2</b> | Yield Farming      | NV            | USHemp       | Alamo1       |
| <b>4</b> | Flowr              | BC            | AlienOG      | AlienOG10    |
| <b>1</b> | Flowr              | BC            | AlienOG      | AlienOG9     |



| <b>K</b> | <b>Producer</b>    | <b>Origin</b> | <b>Pop</b>   | <b>Ind</b>        |
|----------|--------------------|---------------|--------------|-------------------|
| 4        | Flowr              | BC            | ASD          | AmherstSourDiesel |
| 1        | Flowr              | BC            | AmnesiaHaze  | Amnesia           |
| 1        | Flowr              | BC            | AmnesiaHaze  | AmnesiaHaze_a     |
| 4        | Flowr              | BC            | AmnesiaHaze  | AmnesiaHaze12     |
| 3        | Flowr              | BC            | AmnesiaHaze  | AmnesiaHaze13     |
| 4        | Flowr              | BC            | ASD          | ASD1_a            |
| 4        | Flowr              | BC            | ASD          | ASD2_a            |
| 3        | Flowr              | BC            | ASD          | ASD3_a            |
| 1        | Flowr              | BC            | Atomic       | Atomic15          |
| 1        | Flowr              | BC            | Atomic       | Atomic17          |
| 4        | Flowr              | BC            | AtomicalHaze | AtomicalHaze      |
| 1        | Flowr              | BC            | AtomicalHaze | AtomicalHaze_a    |
| 4        | Flowr              | BC            | AtomicalHaze | AtomicalHaze_b    |
| 1        | Okanagan Gold      | BC            | NA           | AyawaskaPurple    |
| 1        | Emerald Flower     | BC            | BananaCake   | BananaCake1       |
| 1        | Emerald Flower     | BC            | BananaCake   | BananaCake4       |
| 1        | Emerald Flower     | BC            | BananaCake   | BananaCake5       |
| 1        | Nature's Chemistry | NV            | NA           | BananaPunch       |
| 1        | CCLV               | NV            | NA           | BananaTreez       |

| <b>K</b> | <b>Producer</b>     | <b>Origin</b> | <b>Pop</b> | <b>Ind</b>      |
|----------|---------------------|---------------|------------|-----------------|
| 4        | Emerald Flower      | BC            | Bananium   | Bananium10      |
| 4        | Emerald Flower      | BC            | Bananium   | Bananium11      |
| 1        | Emerald Flower      | BC            | Bananium   | Bananium2       |
| 1        | Emerald Flower      | BC            | Bananium   | Bananium4       |
| 1        | Emerald Flower      | BC            | Bananium   | Bananium7       |
| 4        | Flowr               | BC            | Belladonna | Belladonna_a    |
| 4        | Flowr               | BC            | Belladonna | Belladonna_b    |
| 2        | Emerald Flower      | BC            | NA         | Berry Blossum   |
| 1        | Okanagan Gold       | BC            | PinkKush   | BestShitEver    |
| 1        | Purefarma           | BC            | PinkKush   | BillyCrystal    |
| 1        | Franklin Bioscience | NV            | NA         | BlackberryCream |
| 4        | Flowr               | BC            | Blackwater | Blackwater18    |
| 1        | Flowr               | BC            | Blackwater | Blackwater19    |
| 1        | Flowr               | BC            | Blackwater | Blackwater20    |
| 3        | Green and Gold      | NV            | NA         | BlackwaterOG    |
| 3        | Green and Gold      | NV            | NA         | BloodDrive      |
| 3        | Emerald Flower      | BC            | NA         | Blue            |
| 1        | Green and Gold      | NV            | NA         | BlueAlien       |
| 1        | CCLV                | NV            | NA         | Blueberry       |

| <b>K</b> | <b>Producer</b>    | <b>Origin</b> | <b>Pop</b>   | <b>Ind</b>       |
|----------|--------------------|---------------|--------------|------------------|
| <b>4</b> | Emerald Flower     | NV            | NA           | Blueberry1       |
| <b>3</b> | Nature's Chemistry | NV            | NA           | BlueberryCookies |
| <b>1</b> | Emerald Flower     | BC            | NA           | BlueberryKush    |
| <b>1</b> | Green and Gold     | NV            | NA           | BlueCheese       |
| <b>3</b> | Green and Gold     | NV            | NA           | BlueDream        |
| <b>3</b> | Green and Gold     | NV            | NA           | BlueHashPlant    |
| <b>3</b> | Green and Gold     | NV            | NA           | BlueHashPlant1   |
| <b>1</b> | Nature's Chemistry | NV            | NA           | BlueZkittlez     |
| <b>2</b> | Western State Hemp | NV            | USHemp       | Boax             |
| <b>3</b> | Flowr              | BC            | Brock        | Brock_a          |
| <b>3</b> | Flowr              | BC            | Brock        | BrockxSA_b       |
| <b>1</b> | Acres              | NV            | NA           | BuckeyePurple    |
| <b>3</b> | Flowr              | BC            | BuddaTahoeOG | BuddaTahoeOG_a   |
| <b>4</b> | Flowr              | BC            | BuddaTahoeOG | BuddhaTahoeOG21  |
| <b>1</b> | Flowr              | BC            | BuddaTahoeOG | BuddhaTahoeOG22  |
| <b>3</b> | Emerald Flower     | BC            | NA           | CB7              |
| <b>4</b> | Flowr              | BC            | NA           | CBDzen_a         |
| <b>3</b> | Flowr              | BC            | NA           | CBDzen_b         |
| <b>1</b> | Terra              | BC            | NA           | CBOG             |

| <b>K</b> | <b>Producer</b>     | <b>Origin</b> | <b>Pop</b>  | <b>Ind</b>     |
|----------|---------------------|---------------|-------------|----------------|
| 1        | Thompson Farm One   | NV            | NA          | CementShoes    |
| 1        | Acres               | NV            | NA          | Chem 91        |
| 1        | Franklin Bioscience | NV            | NA          | Chem4          |
| 3        | Flowr               | BC            | Chem4OG     | Chem4OG23      |
| 3        | Flowr               | BC            | Chem4OG     | Chem4OG24      |
| 4        | Flowr               | BC            | Chem4OG     | Chem4OG25      |
| 4        | Emerald Flower      | BC            | Chemdawg    | chemdawg1      |
| 4        | Franklin Bioscience | NV            | NA          | CherryDiesel   |
| 1        | Emerald Flower      | BC            | NA          | CherryPie      |
| 2        | Hemp Inc.           | NV            | UsHemp      | CherryWine_las |
| 2        | Flowr               | BC            | NA          | Cindy99_a      |
| 1        | Foreman             | BC            | NA          | CitrusFarmer   |
| 1        | Acres               | NV            | NA          | ColoradoSunset |
| 4        | Flowr               | BC            | CottonCandy | CottonCandy30  |
| 4        | Flowr               | BC            | CottonCandy | CottonCandy31  |
| 4        | Flowr               | BC            | CottonCandy | CottonCandy33  |
| 1        | Okanagan Gold       | BC            | NA          | CrownRoyal     |
| 1        | Greenway            | NV            | NA          | CuriousGeorge7 |
| 1        | Emerald Flower      | BC            | NA          | d_CR           |

| <b>K</b> | <b>Producer</b> | <b>Origin</b> | <b>Pop</b>   | <b>Ind</b>    |
|----------|-----------------|---------------|--------------|---------------|
| 1        | Emerald Flower  | BC            | NA           | d_PC          |
| 3        | Emerald Flower  | BC            | NA           | d_RKS         |
| 1        | Emerald Flower  | BC            | NA           | d_SC1         |
| 3        | Emerald Flower  | BC            | NA           | d2            |
| 3        | Emerald Flower  | BC            | NA           | d5            |
| 4        | Emerald Flower  | BC            | NA           | d6            |
| 1        | Emerald Flower  | BC            | NA           | d7            |
| 4        | Emerald Flower  | BC            | NA           | d8            |
| 3        | Emerald Flower  | BC            | NA           | Dance         |
| 3        | Okanagan Gold   | BC            | NA           | DanceHall     |
| 5        | In Planta       | AB            | NA           | darryl        |
| 3        | Flowr           | BC            | Delahaze     | Delahaze_a    |
| 3        | Flowr           | BC            | Delahaze     | Delahaze_b    |
| 4        | Flowr           | BC            | Delahaze     | Delahaze35    |
| 4        | Flowr           | BC            | Delahaze     | Delahaze37    |
| 4        | Flowr           | BC            | Delahaze     | Delahaze38    |
| 1        | Emerald Flower  | BC            | DivineBanana | DivineBanana3 |
| 1        | Emerald Flower  | BC            | DivineBanana | DivineBanana5 |
| 1        | Emerald Flower  | BC            | DivineBanana | DivineBanana6 |

| <b>K</b> | <b>Producer</b> | <b>Origin</b> | <b>Pop</b>    | <b>Ind</b>       |
|----------|-----------------|---------------|---------------|------------------|
| <b>1</b> | Emerald Flower  | BC            | DivineBanana  | DivineBanana7    |
| <b>3</b> | Green and Gold  | NV            | NA            | DJsGold          |
| <b>1</b> | Terra           | BC            | Dosido        | Dosidos_a        |
| <b>1</b> | Terra           | BC            | Dosido        | Dosidos2         |
| <b>1</b> | Matrix          | NV            | Dosido        | Dosidoslas       |
| <b>4</b> | Emerald Flower  | BC            | DualOG        | DualOG10         |
| <b>1</b> | Emerald Flower  | BC            | DualOG        | DualOG2          |
| <b>2</b> | Emerald Flower  | BC            | DualOG        | DualOG3          |
| <b>4</b> | Emerald Flower  | BC            | DualOG        | DualOG4          |
| <b>4</b> | Emerald Flower  | BC            | DualOG        | DualOG8          |
| <b>4</b> | Emerald Flower  | BC            | DualOG        | DualOG9          |
| <b>4</b> | Flowr           | BC            | DurgaMatta    | DurgaMatta_a     |
| <b>4</b> | Flowr           | BC            | DurgaMatta    | DurgaMatta_b     |
| <b>4</b> | Flowr           | BC            | DurgaMatta    | DurgaMatta_c     |
| <b>3</b> | Flowr           | BC            | DurgaMatta2cb | DurgaMatta2cbd_a |
| <b>3</b> | Flowr           | BC            | DurgaMatta2cb | DurgaMatta2cbd_b |
| <b>3</b> | Flowr           | BC            | DurgaMatta2cb | DurgaMatta2cbd_c |
| <b>1</b> | Emerald Flower  | BC            | NA            | DutchTreat       |
| <b>3</b> | Okanagan Gold   | BC            | NA            | Dweed            |

| <b>K</b> | <b>Producer</b>    | <b>Origin</b> | <b>Pop</b>       | <b>Ind</b>         |
|----------|--------------------|---------------|------------------|--------------------|
| <b>3</b> | Island Genetics    | BC            | NA               | Egypt              |
| <b>4</b> | Terra              | BC            | NA               | ElmersGlue         |
| <b>1</b> | Greenway           | NV            | NA               | French Bread       |
| <b>3</b> | Good Uncle         | BC            | NA               | fruitychronic      |
| <b>1</b> | Emerald Flower     | BC            | NA               | Garlic             |
| <b>3</b> | Emerald Flower     | BC            | NA               | GDP                |
| <b>1</b> | Terra              | BC            | NA               | GelatoBreath       |
| <b>1</b> | Emerald Flower     | BC            | NA               | GF                 |
| <b>1</b> | Emerald Flower     | BC            | GG               | GG4                |
| <b>3</b> | Emerald Flower     | BC            | GG               | GG5                |
| <b>4</b> | Purefarma          | BC            | NA               | GGC                |
| <b>1</b> | Flowr              | BC            | GhostTrainHaze   | GhostTrainHaze_a   |
| <b>3</b> | Flowr              | BC            | GhostTrainHaze   | GhostTrainHaze_d   |
| <b>3</b> | Flowr              | BC            | GhostTrainHaze   | GhostTrainHaze_f   |
| <b>3</b> | Nature's Chemistry | NV            | GhostTrainHaze   | GhostTrainHaze_las |
| <b>1</b> | Flowr              | BC            | Girl coutCookies | Girl coutCookies1  |
| <b>1</b> | Flowr              | BC            | Girl coutCookies | Girlscootcookies2  |
| <b>3</b> | Flowr              | BC            | Girl coutCookies | GirlScoutCookies40 |
| <b>3</b> | Flowr              | BC            | Girl coutCookies | GirlScoutCookies41 |

| <b>K</b> | <b>Producer</b>     | <b>Origin</b> | <b>Pop</b>       | <b>Ind</b>                   |
|----------|---------------------|---------------|------------------|------------------------------|
| <b>3</b> | Flowr               | BC            | Girl coutCookies | GirlScoutCookies42           |
| <b>3</b> | Flowr               | BC            | Girl coutCookies | GirlScoutCookies43           |
| <b>3</b> | Flowr               | BC            | Girl coutCookies | GirlScoutCookies45           |
| <b>1</b> | GLP                 | NV            | NA               | GlueOnFire                   |
| <b>3</b> | Emerald Flower      | BC            | NA               | GodBud                       |
| <b>2</b> | Green and Gold      | NV            | NA               | GoldenLemons                 |
| <b>1</b> | Franklin Bioscience | NV            | GorillaGlue      | GorillaGlue                  |
| <b>4</b> | Flowr               | BC            | GorillaGlue      | GorillaGlue_a                |
| <b>3</b> | Flowr               | BC            | GorillaGlue      | GorillaGlue446               |
| <b>1</b> | Flowr               | BC            | GrandDaddyPurps  | GrandDaddyPurps49            |
| <b>1</b> | Flowr               | BC            | GrandDaddyPurps  | GrandDaddyPurps50            |
| <b>3</b> | Good Uncle          | BC            | NA               | Grapefruit                   |
| <b>4</b> | Flowr               | BC            | GrapeFruitGod    | GrapeFruitGod_a              |
| <b>4</b> | Flowr               | BC            | GrapeFruitGod    | GrapeFruitGod_b              |
| <b>4</b> | Flowr               | BC            | GrapeFruitGod    | GrapefruitGod53              |
| <b>1</b> | Flowr               | BC            | GrapeFruitGod    | GrapefruitGod56              |
| <b>1</b> | GLP                 | NV            | NA               | GratefulBreath               |
| <b>4</b> | Flowr               | BC            | GreenCrack       | GreenCrack_a                 |
| <b>2</b> | Western State Hemp  | NV            | UsHemp           | HammermilledBiomassBa<br>g11 |



| <b>K</b> | <b>Producer</b>    | <b>Origin</b> | <b>Pop</b> | <b>Ind</b>              |
|----------|--------------------|---------------|------------|-------------------------|
| <b>2</b> | Western State Hemp | NV            | UsHemp     | HammermilledBiomassBag7 |
| <b>3</b> | Flowr              | BC            | Headband   | Headband1               |
| <b>4</b> | Flowr              | BC            | Headband   | Headband63              |
| <b>1</b> | Polaris MMJ        | NV            | NA         | HeadCheese              |
| <b>1</b> | Greenway           | NV            | NA         | HellsOG                 |
| <b>2</b> | Harris Farms       | NV            | UsHemp     | Hemp1                   |
| <b>2</b> | Harris Farms       | NV            | UsHemp     | Hemp10                  |
| <b>2</b> | Harris Farms       | NV            | UsHemp     | Hemp11                  |
| <b>2</b> | Harris Farms       | NV            | UsHemp     | Hemp12                  |
| <b>2</b> | Harris Farms       | NV            | UsHemp     | Hemp13                  |
| <b>2</b> | Harris Farms       | NV            | UsHemp     | Hemp14                  |
| <b>2</b> | Harris Farms       | NV            | UsHemp     | Hemp15                  |
| <b>2</b> | Harris Farms       | NV            | UsHemp     | Hemp16                  |
| <b>2</b> | Harris Farms       | NV            | UsHemp     | Hemp2                   |
| <b>2</b> | Harris Farms       | NV            | UsHemp     | Hemp3                   |
| <b>2</b> | Leafceuticals      | NV            | UsHemp     | Hemp4                   |
| <b>2</b> | Leafceuticals      | NV            | UsHemp     | Hemp5                   |
| <b>2</b> | Happy Campers      | NV            | UsHemp     | Hemp6                   |
| <b>2</b> | Happy Campers      | NV            | UsHemp     | Hemp7                   |

| <b>K</b> | <b>Producer</b>     | <b>Origin</b> | <b>Pop</b>   | <b>Ind</b>        |
|----------|---------------------|---------------|--------------|-------------------|
| 2        | Calineva Farms      | NV            | UsHemp       | Hemp9             |
| 2        | Calineva Farms      | NV            | UsHemp       | HempBin           |
| 2        | Calineva Farms      | NV            | UsHemp       | HempBucket        |
| 1        | Emerald Flower      | BC            | NA           | High              |
| 4        | Island Genetics     | BC            | NA           | Himalaya          |
| 4        | Island Genetics     | BC            | NA           | HinduKush         |
| 4        | Flowr               | BC            | HollyGrail   | HolyGrail_a       |
| 4        | Flowr               | BC            | HollyGrail   | HolyGrail_b       |
| 1        | Green and Gold      | NV            | HollyGrail   | HolyGrailKush_las |
| 3        | Flowr               | BC            | HollyGrail   | HolyGrailKush64   |
| 1        | Flowr               | BC            | NA           | IceCream          |
| 4        | CCLV                | NV            | NA           | J1                |
| 4        | Franklin Bioscience | NV            | NA           | Jack Herer        |
| 3        | Flowr               | BC            | JacksCleaner | JacksCleaner65    |
| 1        | Flowr               | BC            | JacksCleaner | JacksCleaner66    |
| 1        | Flowr               | BC            | JacksCleaner | JacksCleaner67    |
| 1        | Greenway            | NV            | NA           | JamaicanTenspeed  |
| 1        | Thompson Farm One   | NV            | NA           | JetFuel           |
| 1        | Green and Gold      | NV            | NA           | JohnnyChimpo      |

| <b>K</b> | <b>Producer</b>    | <b>Origin</b> | <b>Pop</b>  | <b>Ind</b>          |
|----------|--------------------|---------------|-------------|---------------------|
| 1        | CCLV               | NV            | NA          | KeyLimePie          |
| 1        | Flowr              | BC            | KosherKush  | KosherKush_b        |
| 1        | Flowr              | BC            | KosherKush  | KosherKush70        |
| 4        | Flowr              | BC            | KosherKush  | KosherKush71        |
| 1        | Flowr              | BC            | KosherKush  | KosherKush72        |
| 3        | Green and Gold     | NV            | NA          | Kushage             |
| 5        | Digipath           | NV            | KYG         | KYG-G               |
| 2        | Digipath           | NV            | KYG         | KYG-M               |
| 1        | Digipath           | NV            | KYG         | KYG-T               |
| 4        | Flowr              | BC            | LACookies   | LACookies73         |
| 3        | Flowr              | BC            | LACookies   | LACookies74         |
| 1        | Flowr              | BC            | LACookies   | LACookies75         |
| 2        | Flowr              | BC            | LACookies   | LACookies76         |
| 2        | Flowr              | BC            | LACookies   | LACookies77         |
| 1        | Emerald Flower     | BC            | NA          | LALights            |
| 3        | Green and Gold     | NV            | NA          | LaPlatina           |
| 3        | Nature's Chemistry | NV            | NA          | LemonBananaSherbert |
| 2        | Emerald Flower     | BC            | LemonGarlic | LemonGarlic         |
| 3        | Purefarma          | BC            | LemonThai   | LemonThai           |

| <b>K</b> | <b>Producer</b>   | <b>Origin</b> | <b>Pop</b> | <b>Ind</b>    |
|----------|-------------------|---------------|------------|---------------|
| <b>4</b> | Flowr             | BC            | LemonThai  | LemonThai1    |
| <b>1</b> | Polaris MMJ       | NV            | NA         | LemonWalkerOG |
| <b>3</b> | CCLV              | NV            | NA         | LOrange       |
| <b>1</b> | Thompson Farm One | NV            | LOUIS      | LouieVIII     |
| <b>1</b> | Greenway          | NV            | LOUIS      | LouieXIIIIOG  |
| <b>4</b> | Flowr             | BC            | LOUIS      | LouisXIII78   |
| <b>3</b> | GLP               | NV            | NA         | LoveTriangle  |
| <b>1</b> | Emerald Flower    | BC            | NA         | Isd           |
| <b>2</b> | Happy Campers     | NV            | NA         | LV1Ground     |
| <b>2</b> | Happy Campers     | NV            | NA         | LV1PregroundA |
| <b>4</b> | Emerald Flower    | BC            | NA         | M1            |
| <b>1</b> | GLP               | NV            | NA         | MAC           |
| <b>1</b> | Greenway          | NV            | NA         | MangoTango    |
| <b>1</b> | Emerald Flower    | BC            | Meathead   | Meathead8     |
| <b>1</b> | Emerald Flower    | BC            | Meathead   | Meathead9     |
| <b>3</b> | Emerald Flower    | BC            | NA         | Medic         |
| <b>1</b> | Green Harvest     | NV            | NA         | Megaslex      |
| <b>3</b> | Emerald Flower    | BC            | NA         | MemoryLoss    |
| <b>1</b> | Terra             | BC            | NA         | MendoBreath   |

| <b>K</b> | <b>Producer</b> | <b>Origin</b> | <b>Pop</b>      | <b>Ind</b>        |
|----------|-----------------|---------------|-----------------|-------------------|
| <b>2</b> | GLP             | NV            | NA              | MissX             |
| <b>1</b> | Greenway        | NV            | NA              | Motorbreath       |
| <b>1</b> | Emerald Flower  | BC            | Nanitro         | Nanitro11         |
| <b>3</b> | Emerald Flower  | BC            | Nanitro         | NAnitro12         |
| <b>3</b> | Emerald Flower  | BC            | Nanitro         | Nanitro8          |
| <b>1</b> | Matrix          | NV            | NA              | NepaleseKush      |
| <b>2</b> | Flowr           | BC            | NA              | NinaXstrw_a       |
| <b>3</b> | Emerald Flower  | BC            | NA              | NN                |
| <b>3</b> | Green and Gold  | NV            | NA              | NorthernLights    |
| <b>3</b> | Acres           | NV            | NA              | NorthernRussian   |
| <b>1</b> | Green and Gold  | NV            | NA              | OGKosher          |
| <b>3</b> | Flowr           | BC            | NA              | OGKush80          |
| <b>3</b> | Terra           | BC            | NA              | OrangeApricot     |
| <b>1</b> | GLP             | NV            | NA              | OrangeCookies     |
| <b>1</b> | Green Harvest   | NV            | NA              | OrangeCreamsicle  |
| <b>1</b> | CCLV            | NV            | NA              | OrangeZeta        |
| <b>3</b> | Flowr           | BC            | OriginalAmnesia | OriginalAmnesia_c |
| <b>3</b> | Flowr           | BC            | OriginalAmnesia | OriginalAmnesia_d |
| <b>3</b> | Flowr           | BC            | OriginalAmnesia | OriginalAmnesia1  |

| <b>K</b> | <b>Producer</b> | <b>Origin</b> | <b>Pop</b>      | <b>Ind</b>        |
|----------|-----------------|---------------|-----------------|-------------------|
| <b>3</b> | Flowr           | BC            | OriginalAmnesia | OriginalAmnesia83 |
| <b>1</b> | Flowr           | BC            | OriginalAmnesia | OriginalAmnesia84 |
| <b>1</b> | Island Genetics | BC            | NA              | Panama1           |
| <b>1</b> | Island Genetics | BC            | NA              | Panama2           |
| <b>1</b> | Emerald Flower  | BC            | NA              | PC                |
| <b>3</b> | Flowr           | BC            | PineappleKush   | PineappleKush_a   |
| <b>3</b> | Flowr           | BC            | PineappleKush   | PineappleKush_b   |
| <b>3</b> | Flowr           | BC            | PineappleKush   | PineappleKush_c   |
| <b>1</b> | Purefarma       | BC            | PinkKush        | Pink              |
| <b>1</b> | Flowr           | BC            | PinkKush        | PinkKush_a        |
| <b>1</b> | Flowr           | BC            | PinkKush        | PinkKush_b        |
| <b>1</b> | Flowr           | BC            | PinkKush        | PinkKush_c        |
| <b>1</b> | Flowr           | BC            | PinkKush        | PinkKush_d        |
| <b>1</b> | Emerald Flower  | BC            | PJP             | PJP4              |
| <b>1</b> | Emerald Flower  | BC            | PJP             | PJP5              |
| <b>3</b> | Emerald Flower  | BC            | PJP             | PJP7              |
| <b>1</b> | Emerald Flower  | BC            | PJP             | PJP8              |
| <b>1</b> | Green and Gold  | NV            | NA              | PlatinumCookies   |
| <b>3</b> | Flowr           | BC            | NA              | POGxSA_b          |

| <b>K</b> | <b>Producer</b> | <b>Origin</b> | <b>Pop</b>  | <b>Ind</b>          |
|----------|-----------------|---------------|-------------|---------------------|
| <b>3</b> | Flowr           | BC            | Pre98Bubba  | Pre98Bubba87        |
| <b>3</b> | Flower One      | NV            | ProofofLife | ProofofLife1a       |
| <b>3</b> | Flower One      | NV            | ProofofLife | ProofofLife1b       |
| <b>2</b> | Flower One      | NV            | ProofofLife | ProofofLife2a       |
| <b>2</b> | Flower One      | NV            | ProofofLife | ProofofLife2b       |
| <b>3</b> | Terra           | BC            | PunchBreath | PunchBreath1        |
| <b>3</b> | Terra           | BC            | PunchBreath | PunchBreath2        |
| <b>3</b> | Terra           | BC            | PunchBreath | PunchBreathMale     |
| <b>3</b> | Green and Gold  | NV            | NA          | PureKush            |
| <b>1</b> | Emerald Flower  | BC            | NA          | PurpleChunk         |
| <b>2</b> | VSSL            | BC            | NA          | PurpleDieselCBDmale |
| <b>4</b> | Emerald Flower  | BC            | NA          | PurpleGod           |
| <b>1</b> | Acres           | NV            | NA          | PurpleHoe           |
| <b>3</b> | Green and Gold  | NV            | NA          | PurpleMonkey        |
| <b>4</b> | CCLV            | NV            | NA          | PurplePunch         |
| <b>3</b> | GLP             | NV            | NA          | PurpleWookie        |
| <b>1</b> | Flowr           | BC            | RascalOG    | RascalsOG89         |
| <b>1</b> | Flowr           | BC            | RemoChemo   | RemoChemo91         |
| <b>1</b> | Flowr           | BC            | RemoChemo   | RemoChemo92         |

| <b>K</b> | <b>Producer</b>     | <b>Origin</b> | <b>Pop</b>         | <b>Ind</b>          |
|----------|---------------------|---------------|--------------------|---------------------|
| <b>1</b> | Flowr               | BC            | RemoChemo          | RemoChemo93         |
| <b>1</b> | Flowr               | BC            | RemoChemo          | RemoChemo94         |
| <b>3</b> | Emerald Flower      | BC            | NA                 | RKS                 |
| <b>1</b> | Greenway            | NV            | NA                 | RocketFuel          |
| <b>5</b> | VSSL                | BC            | NA                 | S2                  |
| <b>3</b> | Terra               | BC            | NA                 | ScoutMaster         |
| <b>1</b> | Flowr               | BC            | NA                 | SensiStar           |
| <b>4</b> | Flowr               | BC            | NA                 | SFVOG_a             |
| <b>1</b> | Flowr               | BC            | NA                 | SFVOG_b             |
| <b>2</b> | Happy Campers       | NV            | USHemp             | Shore               |
| <b>2</b> | Happy Campers       | NV            | USHemp             | Shore1              |
| <b>1</b> | Purefarma           | BC            | NA                 | SillyWabbit         |
| <b>3</b> | Greenway            | NV            | Skunkberry         | Skunkberry          |
| <b>3</b> | Greenway            | NV            | Skunkberry         | Skunkberry1         |
| <b>1</b> | Franklin Bioscience | NV            | NA                 | SlimeDawgMillaNaire |
| <b>1</b> | Green and Gold      | NV            | SourBananaSherbert | SourBananaSherbert  |
| <b>1</b> | Green and Gold      | NV            | SourBananaSherbert | SourBananaSherbert1 |
| <b>1</b> | Okanagan Gold       | BC            | NA                 | SourBlueberry       |
| <b>3</b> | Flowr               | BC            | SourKosherKush     | SourKosherKush_a    |



| <b>K</b> | <b>Producer</b>     | <b>Origin</b> | <b>Pop</b>      | <b>Ind</b>         |
|----------|---------------------|---------------|-----------------|--------------------|
| <b>1</b> | Flowr               | BC            | SourKosherKush  | SourKosherKush96   |
| <b>4</b> | Emerald Flower      | BC            | Sourpatchkids   | Sourpatchkids      |
| <b>3</b> | Flowr               | BC            | SourTangie      | SourTangie_a       |
| <b>3</b> | Flowr               | BC            | SourTangie      | SourTangie_d       |
| <b>3</b> | Flowr               | BC            | SourTangie      | SourTangie100      |
| <b>4</b> | Flowr               | BC            | SourTangie      | SourTangie101      |
| <b>1</b> | Flowr               | BC            | SourTangie      | SourTangie102      |
| <b>3</b> | Flowr               | BC            | SourTangie      | SourTangie103      |
| <b>1</b> | Flowr               | BC            | SourTangie      | SourTangie104      |
| <b>3</b> | Flowr               | BC            | SpaceBomb       | SpaceBomb105       |
| <b>3</b> | Flowr               | BC            | SpaceBomb       | SpaceBomb106       |
| <b>4</b> | Flowr               | BC            | SpaceBomb       | SpaceBomb107       |
| <b>3</b> | Flowr               | BC            | NA              | SpaceDawg108       |
| <b>4</b> | Franklin Bioscience | NV            | NA              | SpaceQueen         |
| <b>3</b> | Emerald Flower      | BC            | NA              | Special            |
| <b>4</b> | Flowr               | BC            | Spoetnik        | Spoetnik           |
| <b>1</b> | CCLV                | NV            | NA              | StardustOG         |
| <b>4</b> | Flowr               | BC            | StrawberryCough | StrawberryCough109 |
| <b>4</b> | Flowr               | BC            | StrawberryCough | StrawberryCough110 |

| <b>K</b> | <b>Producer</b> | <b>Origin</b> | <b>Pop</b>      | <b>Ind</b>         |
|----------|-----------------|---------------|-----------------|--------------------|
| <b>4</b> | Flowr           | BC            | StrawberryCough | StrawberryCough111 |
| <b>1</b> | CCLV            | NV            | NA              | StrawberryLemonade |
| <b>1</b> | Matrix          | NV            | NA              | SugarTits          |
| <b>4</b> | Matrix          | NV            | NA              | SugarTitsFrozen    |
| <b>3</b> | Flowr           | BC            | SuperLemonHaze  | SuperLemonHaze_a   |
| <b>4</b> | Flowr           | BC            | SuperLemonHaze  | SuperLemonHaze112  |
| <b>1</b> | Emerald Flower  | BC            | Supersherb      | SuperSherb         |
| <b>2</b> | Matrix          | NV            | NA              | SuperSourDiesel    |
| <b>1</b> | Matrix          | NV            | NA              | SweetPink          |
| <b>1</b> | Flowr           | BC            | Sweettooth      | Sweettooth_a       |
| <b>1</b> | Flowr           | BC            | Sweettooth      | Sweettooth_b       |
| <b>3</b> | Flowr           | BC            | Sweettooth      | Sweettooth_d       |
| <b>1</b> | Emerald Flower  | BC            | NA              | Tahoe              |
| <b>4</b> | Flowr           | BC            | TahoeOG         | TahoeOG115         |
| <b>4</b> | Flowr           | BC            | TahoeOG         | TahoeOG116         |
| <b>1</b> | Flowr           | BC            | TahoeOG         | TahoeOG117         |
| <b>4</b> | Flowr           | BC            | TahoeOG         | TahoeOG118         |
| <b>3</b> | Flowr           | BC            | TahoeOG         | TahoeOG119         |
| <b>3</b> | Flowr           | BC            | TangerineDream  | TangerineDream_a   |

| <b>K</b> | <b>Producer</b>     | <b>Origin</b> | <b>Pop</b>     | <b>Ind</b>           |
|----------|---------------------|---------------|----------------|----------------------|
| <b>3</b> | Flowr               | BC            | TangerineDream | TangerineDream_b     |
| <b>4</b> | Flowr               | BC            | TangerineDream | TangerineDream_c     |
| <b>4</b> | Flowr               | BC            | TangerineDream | TangerineDream_d     |
| <b>3</b> | Flowr               | BC            | TangerineDream | TangerineDream120    |
| <b>4</b> | Flowr               | BC            | TangerineDream | TangerineDream121    |
| <b>1</b> | Flowr               | BC            | TangerineDream | TangerineDream122    |
| <b>3</b> | Flowr               | BC            | TangerineDream | TangerineDream123    |
| <b>4</b> | Flowr               | BC            | TangerineDream | TangerineDream124    |
| <b>4</b> | Purefarma           | BC            | NA             | Thailights           |
| <b>3</b> | Purefarma           | BC            | NA             | ThaiPicnick          |
| <b>1</b> | Thompson Farm One   | NV            | NA             | ThinMint             |
| <b>4</b> | Franklin Bioscience | NV            | NA             | TKStarDawgHaze       |
| <b>3</b> | Emerald Flower      | BC            | NA             | Tonic                |
| <b>1</b> | Emerald Flower      | BC            | NA             | Trainwreck           |
| <b>3</b> | Emerald Flower      | BC            | NA             | Treat                |
| <b>2</b> | Green and Gold      | NV            | NA             | TripleGorillaCookies |
| <b>1</b> | CCLV                | NV            | NA             | Tropicanna           |
| <b>3</b> | Purefarma           | BC            | NA             | TropicThunder        |
| <b>1</b> | Polaris MMJ         | NV            | NA             | TrueOG               |

| <b>K</b> | <b>Producer</b>    | <b>Origin</b> | <b>Pop</b>   | <b>Ind</b>                   |
|----------|--------------------|---------------|--------------|------------------------------|
| <b>1</b> | Greenway           | NV            | Ukcheese     | UKCheese2                    |
| <b>3</b> | VSSL               | BC            | NA           | UnicornCBD                   |
| <b>1</b> | Matrix             | NV            | NA           | UV                           |
| <b>1</b> | Matrix             | NV            | NA           | UV1                          |
| <b>1</b> | GLP                | NV            | NA           | VCM                          |
| <b>3</b> | Flowr              | BC            | ViolatorKush | ViolatorKush_a               |
| <b>1</b> | Flowr              | BC            | ViolatorKush | ViolatorKush1                |
| <b>3</b> | Flowr              | BC            | ViolatorKush | ViolatorKush125              |
| <b>3</b> | Flowr              | BC            | ViolatorKush | ViolatorKush126              |
| <b>3</b> | Flowr              | BC            | ViolatorKush | ViolatorKush127              |
| <b>1</b> | Flowr              | BC            | ViolatorKush | ViolatorKush128              |
| <b>1</b> | Flowr              | BC            | ViolatorKush | ViolatorKush129              |
| <b>3</b> | Good Uncle         | BC            | NA           | w3                           |
| <b>1</b> | Good Uncle         | BC            | NA           | w4                           |
| <b>3</b> | Good Uncle         | BC            | NA           | w5                           |
| <b>2</b> | Western State Hemp | NV            | USHemp       | WesternStatesHemp            |
| <b>2</b> | Western State Hemp | NV            | USHemp       | WesternStatesHempBioma<br>ss |
| <b>4</b> | Flowr              | BC            | WhiteRussian | WhiteRussian_c               |
| <b>4</b> | Flowr              | BC            | WhiteRussian | WhiteRussian_d               |

| <b>K</b> | <b>Producer</b> | <b>Origin</b> | <b>Pop</b>   | <b>Ind</b>      |
|----------|-----------------|---------------|--------------|-----------------|
| 4        | Flowr           | BC            | WhiteRussian | WhiteRussian130 |
| 4        | Flowr           | BC            | WhiteRussian | WhiteRussian131 |
| 4        | Flowr           | BC            | WhiteRussian | WhiteRussian132 |
| 4        | Flowr           | BC            | WhiteRussian | WhiteRussian133 |
| 4        | Flowr           | BC            | WhiteRussian | WhiteRussian134 |
| 1        | Green Harvest   | NV            | NA           | Wildberrykush   |
| 3        | Good Uncle      | BC            | NA           | WLKush          |
| 5        | Flying Creek    | SK            | X59          | X59_1           |
| 5        | Flying Creek    | SK            | X59          | X59_10          |
| 5        | Flying Creek    | SK            | X59          | X59_11          |
| 5        | Flying Creek    | SK            | X59          | X59_12          |
| 5        | Flying Creek    | SK            | X59          | X59_2           |
| 5        | Flying Creek    | SK            | X59          | X59_3           |
| 5        | Flying Creek    | SK            | X59          | X59_4           |
| 5        | Flying Creek    | SK            | X59          | X59_5           |
| 5        | Flying Creek    | SK            | X59          | X59_6           |
| 5        | Flying Creek    | SK            | X59          | X59_7           |
| 5        | Flying Creek    | SK            | X59          | X59_8           |
| 5        | Flying Creek    | SK            | X59          | X59_9           |

| <b>K</b> | <b>Producer</b> | <b>Origin</b> | <b>Pop</b> | <b>Ind</b> |
|----------|-----------------|---------------|------------|------------|
| 5        | Purefarma       | BC            | X59        | X59ind     |
| 5        | Purefarma       | BC            | X59        | X59sat     |
| 4        | GLP             | NV            | NA         | ZellysGift |

Cultivation partners: Emerald Flower Farm, Terra Labs, Foreman Farms, Flying Creek Trading, Purefarma Solutions, Good Uncle Green Eyes, Matrix NV, GLP, Greenway, CCLV, Green and Gold, Nature's Chemistry, Western State Hemp, Harris Farms, Leafceuticals, Hemp Inc., Calineva Farms, Happy Campers, Yield Farming, Franklin BioScience, Polaris MMJ, Acres, InPlanta Biotechnologies , Thompson Farm One, the Flowr Corporation and Green Harvest.
